# Supplementary material for: Myeloid GRK2 Regulates Obesity-Induced Endothelial Dysfunction by Modulating Inflammatory Responses in Perivascular Adipose Tissue
Source: MDPI journal article supplement (doi:10.3390/antiox9100953), 2020-10-04
Supplement: s1 [file s1]

## TITLE

# Myeloid GRK2 regulates obesity-induced endothelial dysfunction by modulating inflammatory responses in perivascular adipose tissue.

## Authors

<sup>1,2</sup>María González-Amor, <sup>3,+</sup>Rocío Vila-Bedmar, <sup>1,2,+</sup>Raquel Rodríguez-Díez, <sup>4</sup>Rosa Moreno-Carriles, <sup>2,5,6</sup>Alba C. Arcones, <sup>2,5,6</sup>Marta Cruces-Sande, <sup>1,2</sup>Mercedes Salaices, <sup>2,5,6</sup>Federico Mayor Jr., <sup>1,2\*</sup>Ana M. Briones and <sup>2,5,6,\*</sup>Cristina Murga

<sup>1</sup>Dpt. Farmacología, Facultad de Medicina, Universidad Autónoma de Madrid, Instituto de Investigación Hospital La Paz, Madrid, Spain.

<sup>2</sup>Ciber de Enfermedades Cardiovasculares (CIBERCV), Spain.

<sup>3</sup>Dpt de Ciencias Básicas de la Salud, Facultad de Ciencias de la Salud, Universidad Rey Juan Carlos (URJC), Spain.

<sup>4</sup>Servicio de Angiología y Cirugía Vascular. Hospital Universitario La Princesa. Madrid.

<sup>5</sup>Departamento de Biología Molecular and Centro de Biología Molecular Severo Ochoa (CBMSO) UAM-CSIC, Madrid, Spain.

<sup>6</sup>Instituto de Investigación Sanitaria Hospital Universitario La Princesa, Madrid, Spain.

<sup>+</sup>These authors contributed equally to this work.

\* Correspondence: cristina.murga@uam.es (C.M.); ana.briones@uam.es (A.M.B.)

## Supplementary material

### Supplementary Figure 1.

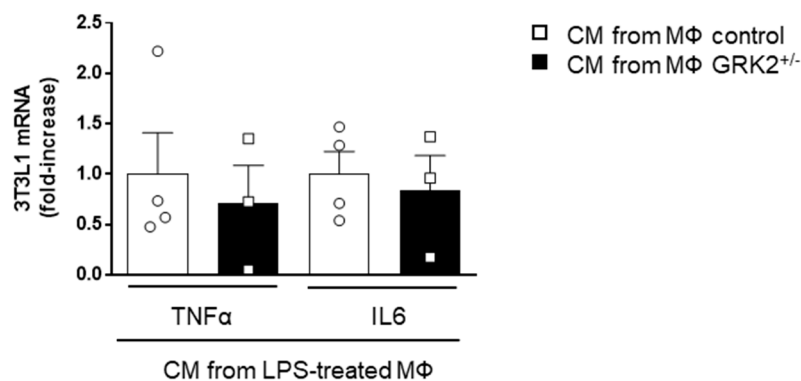

**Legend to Supplementary Fig. 1.** mRNA expression of TNFα and IL6 in 3T3L1 adipocytes stimulated for 24h with the conditioned medium (CM) obtained from macrophages (MΦ) isolated from either control or LysM-GRK2<sup>+/-</sup> mice; these macrophages were previously treated with 1μg/mL LPS for 6 hours. Graphs represent fold change over control (3T3L1 adipocytes stimulated with the CM of LPS-treated control macrophages). Data are expressed as mean ± SEM. Statistical significance was analyzed by two-way ANOVA followed by Bonferroni posthoc test (n=3-4).

## Supplementary Methods

3T3L1 preadipocytes were cultured in DMEM supplemented with 10% FBS and differentiated as previously described (Vila-Bedmar et al., *FASEB J* 2012 26(8):3503). At day 10 post-differentiation, adipocytes were serum starved (1% FBS) overnight and further incubated with the conditioned medium (CM) of thioglycollate elicited peritoneal macrophages obtained from control or LysM-GRK2<sup>+/-</sup> mice, treated or not with 1 µg/mL LPS for 6 hours. 24h later, 3T3L1 adipocytes were lysed with QIAzol reagent (Qiagen) to isolate RNA. Quantity and quality of RNA were analyzed using Nanodrop ND-1000 (Thermo Scientific) and Bioanalyzer 2100 (Agilent). RT-PCRs were performed with the aid of the Genomic Facility of the Centro de Biología Molecular Severo Ochoa using Light Cycler equipment (Roche) with Sybr Green technology and self-designed murine probes purchased from Sigma-Aldrich (Supplementary Table 1). *Ppia* was used as reference gene following the recommendations of GenNorm and NormFinder algorithms.

**Supplementary Table 1.** Primers used for real time PCR analysis in 3T3L1 adipocytes:

| GENE NAME   | NCBI seq  | Forward sequence        | Reverse sequence           |
|-------------|-----------|-------------------------|----------------------------|
| Mice        |           |                         |                            |
| <i>Tnfa</i> | NM_013693 | 5' TCTTCTCATTCTGCTTGTGG | 5' GGTCTGGGCCATAGAACTGA    |
| <i>Il6</i>  | NM_031168 | 5'TGATGGATGCTACCAAAGTGG | 5'TTCATGTACTCCAGGTAGCTATGG |
| <i>Ppia</i> | NM_008907 | 5'ACGCCACTGTCGCTTTTC    | 5'GCAAACAGCTCGAAGGAGAC     |

## References

GRK2 contribution to the regulation of energy expenditure and brown fat function.  
Vila-Bedmar R, Garcia-Guerra L, Nieto-Vazquez I, Mayor F Jr, Lorenzo M, Murga C, Fernández-Veledo S. *FASEB J*. 2012 Aug;26(8):3503-14. doi: 10.1096/fj.11-202267.
